# Supplementary material for: Sensing the Messenger: Potential Roles of Cyclic-di-GMP in Rickettsial Pathogenesis
Source: MDPI journal article supplement (doi:10.3390/ijms23073853), 2022-03-31
Supplement: s1 [file s1]

**Supplementary File S1:** The nucleotide sequence of *pleD* gene of *Rickettsia rickettsii* strains Sheila Smith and Iowa. The full-length *pleD* gene was amplified using *pleD*-F and *pleD*-R primers as mentioned in the methods section. The PCR product was cloned into pGEM-T Easy vector and Sanger sequencing of the insert (*pleD* gene) was performed using T7 and SP6 primers (A). Alignment of *R. rickettsii* str. Iowa (Rr\_I) and *R. rickettsii* str. Sheila Smith (Rr\_SS) *PleD* protein sequences. The amino acid change at position 236 is highlighted in red (B).

#### A. *pleD* gene sequences from *R. rickettsii* strains

##### *R. rickettsii* str. Iowa

```
ATGACCACAATATTAGTAGTAGATGATATAGAACCCAATATTAAGTTACTAACAGCCAACTTTTAAAAGAGTATTA
TACGGTTCCTACTGCAAATAGCGGTAAAGAAGCACTAGCAATTCTTAAAAAGAAAAATTGATATTATACTACTTG
ATGTTATGATGCCGAAATTGATGGATTTGAGGTATGTAAAACGATAAAAACCGATCCGGAAACTACTCATATACCG
GTTGTAATGGTAACTGCACTTTCCGATATTGATGATCGAGTTAAAGGTCTTGAGGCAGGAGCTGATGAGTTTTTAAC
AAAGCCGATTAACGATACTGCTCTATTTGTAAGACTTAAATCGCTATCTAGAATGAAAAGCTTAATTGATGAGTTAA
AGCTTCGTAATAGCACTAATGCATTATTAGGCGTAACAAATATCGAAATGCATGACACTTTTGCAGATAAAAAAATA
TTACTCATTAATGATGATGTGGTGCAAACATAAAATATAAAACAAATGTTACTTAAGCTTACCCAAAACGTAAAGGT
AATAAGTAATTCCGATGAATTAGATATTATAAATGAATATAACCCCGATTTAGTAATTATCAGTAGTACGCTCGAAA
ATGACGATCCTTTGAGGATCAGTGTTATTTTAAGAGGTAAAGCAGAAATAAGCGGCGTAGTAATAATTTTACAAATT
GATGAAGACGGTATGCCTTTGGTTGTGAAAGGTATTGAACTCGGTATTAATGATTATTTTCGTTTATCCTATAGAGGA
AAGCGAATTGCTTGCTAGAATTAGAACACAATTAAGACGTAAGCAATATCAAGATAATTTACGTAATGATCTTGAAC
AAAGTGCAATTTAGCAGTTAAAGACGGTCTAACCGGCTTATTTAATCGTCGCTATTTTCGATATACATCTCAAACAA
ATTATTGAGAAAACTAATAAAGAAAGTATTAAATTATGTTTACTTATGTGCGATATCGACAAATTTAAACATGTAAA
CGATACTTACGGTCATCAAGCAGGCGATAAGGTTTTAACAATTGTATCCCGTATTTTGAAGAATACTCTCAGAGTAA
CAGACTTAATAGCAAGATTCGGCGGTGAAGAATTTACTATACTCTTAACGGATATAGATATTTCTAAAGCAATTGAA
ACTGCGGAGAGAGTGAGAGTTAAATAGAATATATGAATTTTACATTGAAGATCAAATTGAACCTTTAAAAACAAC
TATTTCAATCGGAGTTACGAAATATAAAAAAGAAGAATCAATAGAATCTTTTCATTGAACGTGCTGACAAAGCTATGT
ATGAAGCTAAAACAACGGGTAAAAATAAAGTAGTAAAATTATAA
```

##### *R. rickettsii* str. Sheila Smith

```
ATGACCACAATATTAGTAGTAGATGATATAGAACCCAATATTAAGTTACTAACAGCCAACTTTTAAAAGAGTATTA
TACGGTTCCTACTGCAAATAGCGGTAAAGAAGCACTAGCAATTCTTAAAAAGAAAAATTGATATTATACTACTTG
ATGTTATGATGCCGAAATTGATGGATTTGAGGTATGTAAAACGATAAAAACCGATCCGGAAACTACTCATATACCG
GTTGTAATGGTAACTGCACTTTCCGATATTGATGATCGAGTTAAAGGTCTTGAGGCAGGAGCTGATGAGTTTTTAAC
AAAGCCGATTAACGATACTGCTCTATTTGTAAGACTTAAATCGCTATCTAGAATGAAAAGCTTAATTGATGAGTTAA
AGCTTCGTAATAGCACTAATGCATTATTAGGCGTAACAAATATCGAAATGCATGACACTTTTGCAGATAAAAAAATA
TTACTCATTAATGATGATGTGGTGCAAACATAAAATATAAAACAAATGTTACTTAAGCTTACCCAAAACGTAAAGGT
AATAAGTAATTCCGATGAATTAGATATTATAAATGAATATAACCCCGATTTAGTAATTATCAGTAGTACGCTCGAAA
ATGACGATCCTTTGAGGATCAGTGTTATTTTAAGAGGTAAAGCAGAAATAAGCGGCGTAGTAATAATTTTACAAATT
GATGAAGACGGTATACCTTTGGTTGTGAAAGGTATTGAACTCGGTATTAATGATTATTTTCGTTTATCCTATAGAGGA
AAGCGAATTGCTTGCTAGAATTAGAACACAATTAAGACGTAAGCAATATCAAGATAATTTACGTAATGATCTTGAAC
AAAGTGCAATTTAGCAGTTAAAGACGGTCTAACCGGCTTATTTAATCGTCGCTATTTTCGATATACATCTCAAACAA
ATTATTGAGAAAACTAATAAAGAAAGTATTAAATTATGTTTACTTATGTGCGATATCGACAAATTTAAACATGTAAA
CGATACTTACGGTCATCAAGCAGGCGATAAGGTTTTAACAATTGTATCCCGTATTTTGAAGAATACTCTCAGAGTAA
CAGACTTAATAGCAAGATTCGGCGGTGAAGAATTTACTATACTCTTAACGGATATAGATATTTCTAAAGCAATTGAA
ACTGCGGAGAGAGTGAGAGTTAAATAGAATATATGAATTTTACATTGAAGATCAAATTGAACCTTTAAAAACAAC
TATTTCAATCGGAGTTACGAAATATAAAAAAGAAGAATCAATAGAATCTTTTCATTGAACGTGCTGACAAAGCTATGT
ATGAAGCTAAAACAACGGGTAAAAATAAAGTAGTAAAATTATAA
```

## B. Alignment of PleD protein sequences from *R. rickettsii* strains

Rr\_I: *R. rickettsii* str. Iowa; Rr\_SS: *R. rickettsii* str. Sheila Smith

|       |                                                                           |     |
|-------|---------------------------------------------------------------------------|-----|
| Rr_I  | MTTILVVDDIEPNIKLLTAKLLKEYYTVLTANSKGKEALAILKKEKIDIILLDVMMP EIDG            | 60  |
| Rr_SS | MTTILVVDDIEPNIKLLTAKLLKEYYTVLTANSKGKEALAILKKEKIDIILLDVMMP EIDG<br>*****   | 60  |
| Rr_I  | FEVCKTIKTDPE TTHIPVVMVTALSDIDDRVKGLEAGADEFLTKPINDTALFVRLKSLSR             | 120 |
| Rr_SS | FEVCKTIKTDPE TTHIPVVMVTALSDIDDRVKGLEAGADEFLTKPINDTALFVRLKSLSR<br>*****    | 120 |
| Rr_I  | MKSLIDELKLRNSTNALLGVTNIEMHDTFADKKILLINDDVVQTKNIQMLLKL TQNVKV              | 180 |
| Rr_SS | MKSLIDELKLRNSTNALLGVTNIEMHDTFADKKILLINDDVVQTKNIQMLLKL TQNVKV<br>*****     | 180 |
| Rr_I  | ISNSDELDIINEYTPDLV IISSTLENDDPLRISVILRGKAEISGVV IILQIDEDG M PLVV          | 240 |
| Rr_SS | ISNSDELDIINEYTPDLV IISSTLENDDPLRISVILRGKAEISGVV IILQIDEDG M PLVV<br>***** | 240 |
| Rr_I  | KGIELGINDYFVYPIEESELLARIRTQLRRKQYQDNLRNDLEQSVNLAVKDGLTG LFNRR             | 300 |
| Rr_SS | KGIELGINDYFVYPIEESELLARIRTQLRRKQYQDNLRNDLEQSVNLAVKDGLTG LFNRR<br>*****    | 300 |
| Rr_I  | YFDIHLKQ IIEKTNKESIKLCLLMCDIDNFKHVNDTYGHQAGDKVLTIVSRILKNTLRVT             | 360 |
| Rr_SS | YFDIHLKQ IIEKTNKESIKLCLLMCDIDNFKHVNDTYGHQAGDKVLTIVSRILKNTLRVT<br>*****    | 360 |
| Rr_I  | DLIARFGGEEFTILLTDIDISKA IETAERVRVKIEYMNFIHEDQIEPLKTTISIGVTKYK             | 420 |
| Rr_SS | DLIARFGGEEFTILLTDIDISKA IETAERVRVKIEYMNFIHEDQIEPLKTTISIGVTKYK<br>*****    | 420 |
| Rr_I  | KEESIESFIERADKAMYEAKTTGKNKVVKL                                            | 450 |
| Rr_SS | KEESIESFIERADKAMYEAKTTGKNKVVKL<br>*****                                   | 450 |
