# Supplementary material for: Sensing the Messenger: Potential Roles of Cyclic-di-GMP in Rickettsial Pathogenesis
Source: Int J Mol Sci. 2022 Mar 31;23(7):3853. doi: 10.3390/ijms23073853 (PMC8999164; doi:10.3390/ijms23073853)
Supplement: Supplementary file 1 [file ijms-23-03853-s001.zip › ijms-1624694-Supplementary Table S1.xlsx]

## Sheet: Sheet1
Supplementary Table 1: List of PleD protein sequences from different Rickettsia species used for phylogenetic analysis
Rickettsia species	Accession number
Spotted fever group
Rickettsia rickettsii str. Hlp#2	YP_005295061.1
Rickettsia rickettsii str. Hino	YP_005293735.1
Rickettsia rickettsii str. Brazil	YP_005292971.1
Rickettsia rickettsii str. Hauke	YP_005288595.1
Rickettsia rickettsii str. Arizona	YP_005287240.1
Rickettsia rickettsii str. Colombia	YP_005285888.1
Rickettsia rickettsii str. Iowa	YP_001649690.1
Rickettsia rickettsii str. Sheila Smith	Our study
Rickettsia philipii str. 364D	YP_005300409.1
Rickettsia africae ESF-5	YP_002844987.1
Rickettsia parkeri str. Portsmouth	YP_005392574.1
Rickettsia sibirica 246	ZP_00142216.1
Rickettsia conorii str. Malish 7	NP_359958.1
Rickettsia peacockii str. Rustic	YP_002916253.1
Rickettsia slovaca str. D-CWPP	YP_005426066.1
Rickettsia slovaca 13-B	YP_005065537.1
Rickettsia heilongjiangensis 054	YP_004764042.1
Rickettsia japonica YH	YP_004884608.1
Rickettsia montanensis str. OSU 85-930	YP_005392024.1
Candidatus Rickettsia amblyommii str. GAT-30V	YP_005365072.1
Rickettsia rhipicephali str. 3-7-female6-CWPP	YP_005390166.1
Rickettsia massiliae str. AZT80	YP_005302491.1
Rickettsia massiliae MTU5	YP_001499130.1
Rickettsia helvetica C9P9	ZP_10851868.1
Rickettsia endosymbiont of Ixodes scapularis	ZP_04699577.1
Transitional group
Rickettsia akari str. Hartford	YP_001493168.1
Rickettsia australis str. Cutlack	YP_005415359.1
Rickettsia felis URRWXCal2	YP_247066.1
Typhus group
Rickettsia typhi str. B9991CWPP	YP_005423548.1
Rickettsia typhi str. TH1527	YP_005427309.1
Rickettsia typhi str. Wilmington	YP_067192.1
Rickettsia prowazekii str. RpGvF24	YP_005413679.1
Rickettsia prowazekii str. BuV67-CWPP	YP_005412841.1
Rickettsia prowazekii str. Katsinyian	YP_005406180.1
Rickettsia prowazekii str. Chernikova	YP_005405334.1
Rickettsia prowazekii str. Dachau	YP_005407021.1
Rickettsia prowazekii str. GvV257	YP_005404759.1
Rickettsia prowazekii Rp22	YP_005998646.1
Rickettsia prowazekii str. Madrid E	NP_220622.1
Ancestral group
Rickettsia canadensis str. CA410	YP_005299318.1
Rickettsia canadensis str. McKiel	YP_001492004.1
Rickettsia bellii RML369-C	YP_538143.1
Rickettsia bellii OSU 85-389	YP_001496148.1
Outgorup
Anaplasma marginale str. Florida	YP_002563473.1
